# Supplementary material for: Impaired Glucocorticoid Receptor Signaling Aggravates Lung Injury after Hemorrhagic Shock
Source: MDPI journal article supplement (doi:10.3390/cells11010112), 2021-12-30
Supplement: s1 [file s1]

---

Article

# Impaired Glucocorticoid Receptor Signaling Aggravates Lung Injury after Hemorrhagic Shock

Jonathan M. Preuss <sup>1</sup>, Ute Burret <sup>1</sup>, Michael Gröger <sup>2</sup>, Sandra Kress <sup>2</sup>, Angelika Scheuerle <sup>3</sup>, Peter Möller <sup>3</sup>, Jan P. Tuckermann <sup>1</sup>, Martin Wepler <sup>2,4,†</sup>, Sabine Vettorazzi <sup>1,\*,†</sup>

<sup>1</sup> Institute of Comparative Molecular Endocrinology (CME), Ulm University, Ulm, Germany

<sup>2</sup> Institute for Anesthesiologic Pathophysiology and Process Engineering, Ulm University, Ulm, Germany

<sup>3</sup> Institute of Pathology, University Hospital, Ulm, Germany

<sup>4</sup> Department of Anesthesiology and Intensive Care Medicine, University Hospital, Ulm, Germany

\* Correspondence: [sabine.vettorazzi@uni-ulm.de](mailto:sabine.vettorazzi@uni-ulm.de)

† These authors have contributed equally to this work.

## Supplementaries

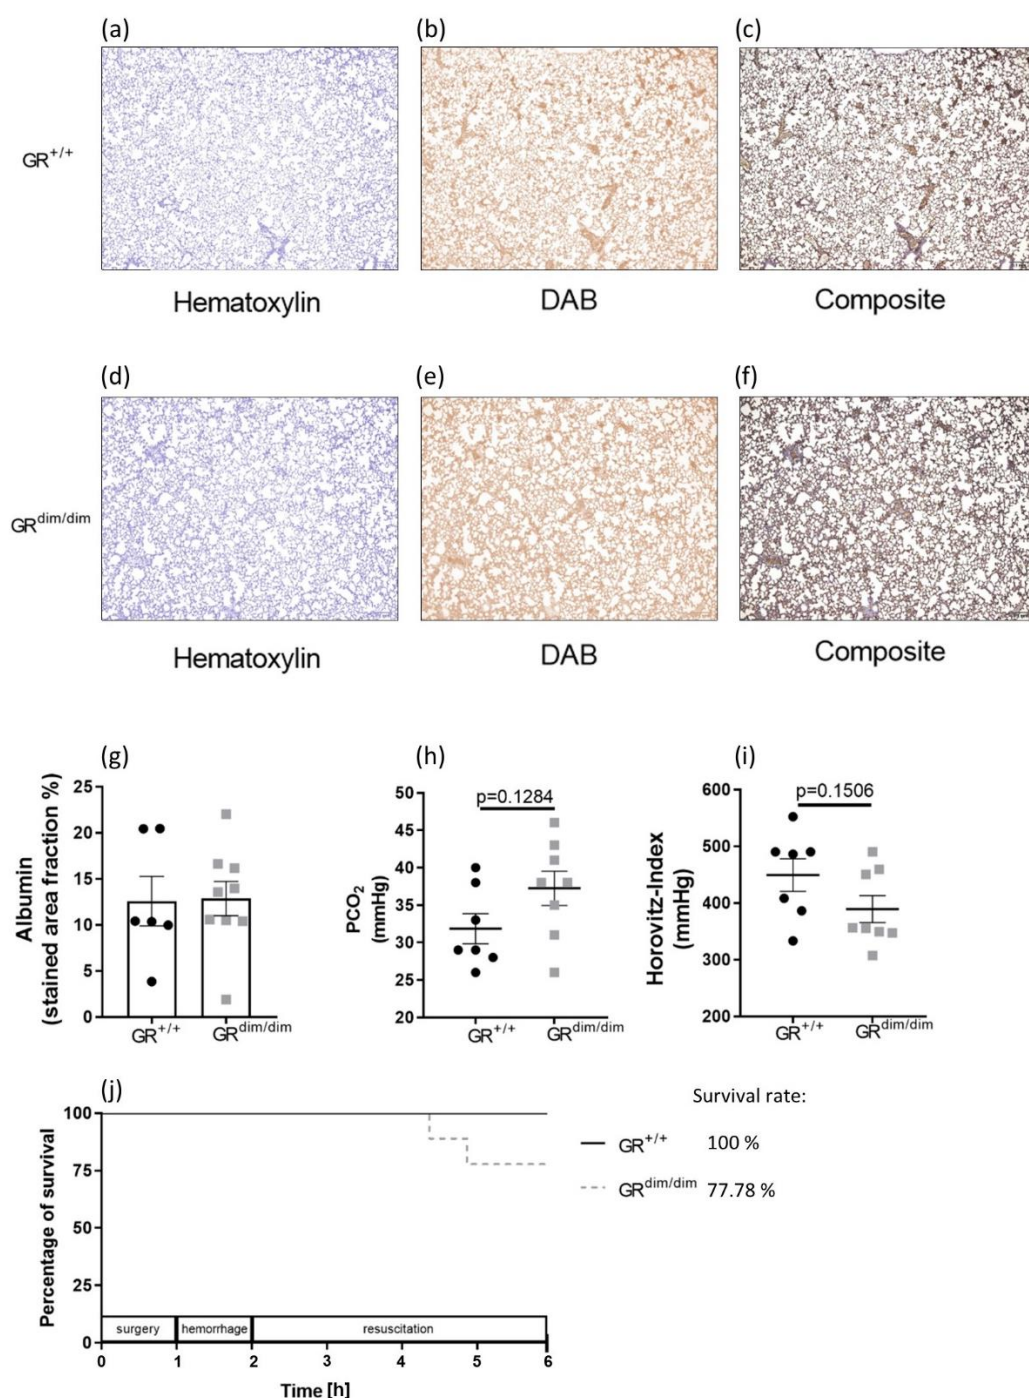

**Figure S1:** Vascular permeability, blood gas analysis and survival of  $GR^{dim/dim}$  mice and  $GR^{+/+}$  mice after HS in MICU. (a) Representative hematoxylin counter-stained lung slice of  $GR^{+/+}$  mouse. (b) DAB signal for albumin detection on lung slice from  $GR^{+/+}$  mouse. (c) Overlay of hematoxylin and DAB staining as composite of  $GR^{+/+}$  mouse. Below, representative pictures of lung slice from a  $GR^{dim/dim}$  mouse with (d) hematoxylin staining, (e) DAB staining and (f) composite. All pictures were taken with 4× magnification. (g) Stained area fraction of albumin was not different between lung slices of  $GR^{dim/dim}$  mice and  $GR^{+/+}$  mice. (h) HS led to trends of enhanced arterial partial carbon dioxide pressure ( $PCO_2$ ) in  $GR^{dim/dim}$  mice compared to  $GR^{+/+}$ . (i)  $GR^{dim/dim}$  mice showed tendencies of a reduced Horovitz-Index (ratio of inhaled oxygen fraction to arterial partial oxygen pressure) after HS compared to  $GR^{+/+}$ . (j) 77.78 % of  $GR^{dim/dim}$  mice survived at the end of the experiment while all  $GR^{+/+}$  mice survived. Significance was analyzed with unpaired Mann-Whitney and indicated according to \*  $p < 0.05$ , \*\*  $p < 0.01$ , \*\*\*  $p < 0.001$ .

(a)

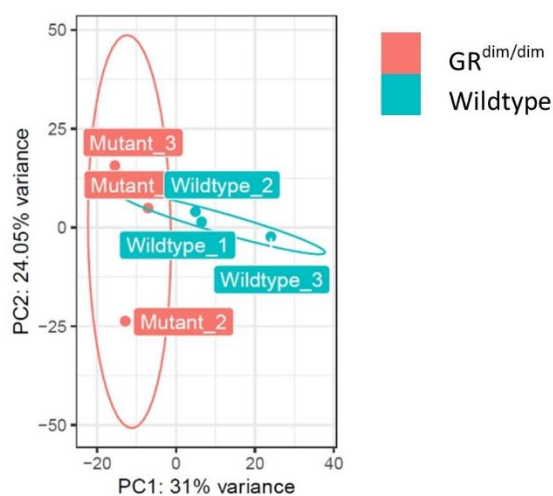

(b)

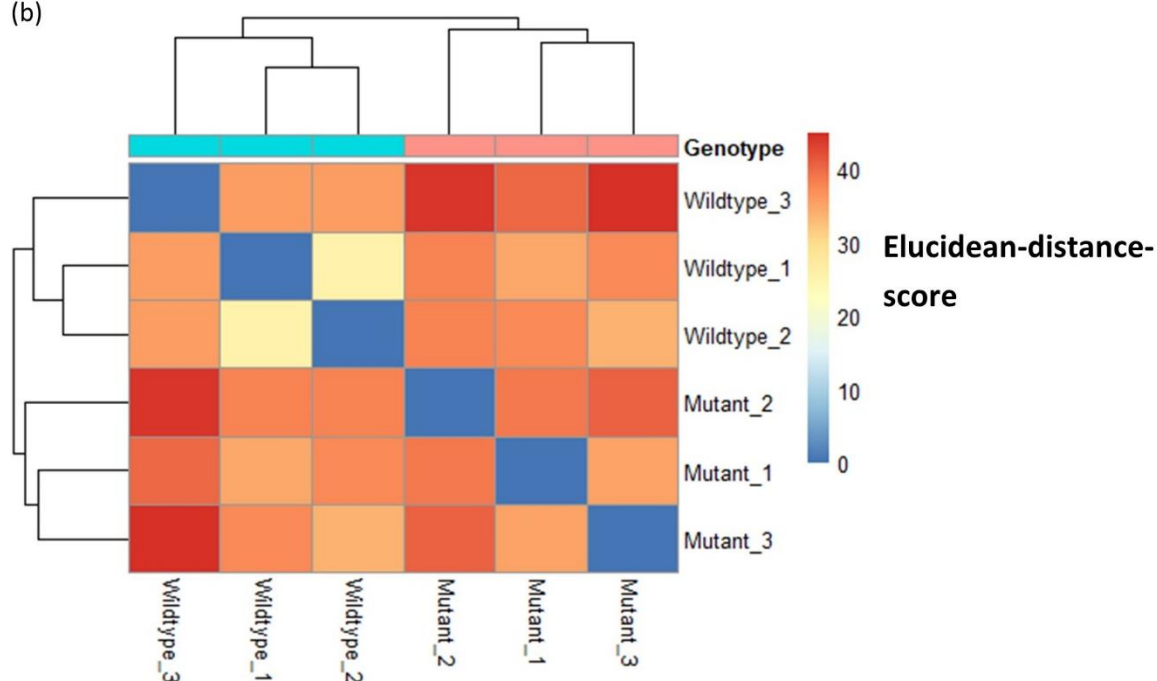

**Figure S2:** Quality assessment of RNA-sequencing results. (a) PCA blot showing clustering of the samples according to the genotype for their variance (PCA1 and PCA2). (b) Heatmap of euclidean-distance-clustering in a sample-to-sample comparison indicating least (blue) to most (red) differences in gene expression profile. Dendrograms cluster the samples according to their similarities.

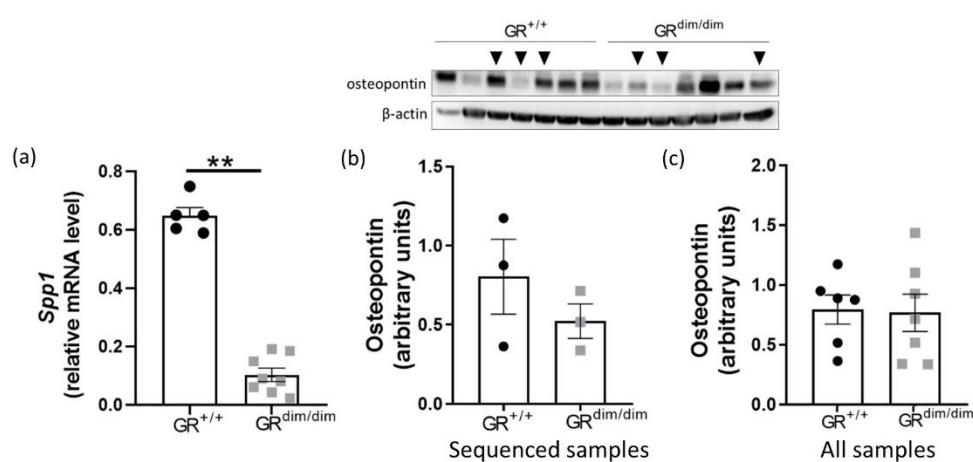

**Figure S3:**  $GR^{dim/dim}$  mice showed reduced RNA but not protein level of osteopontin in the lung after HS. (a) qRT-PCR showed significantly reduced *Spp1* expression in lung samples of  $GR^{dim/dim}$  mice compared to lung samples of  $GR^{+/+}$  mice after HS. (b) Analysis of the lung tissue samples that were analyzed by RNA-sequencing (indicated by arrow heads in the blot) showed trends towards reduced protein level of osteopontin (OPN), the gene product of *Spp1*, in  $GR^{dim/dim}$  lungs compared to  $GR^{+/+}$  after HS. (c) Western blot of lungs samples from all  $GR^{dim/dim}$  and  $GR^{+/+}$  mice after HS showed no genotype dependent differences of OPN. Data points shown in (b) are included in (c). Significance was analyzed with unpaired Mann-Whitney and indicated according to \*  $p < 0.05$ , \*\*  $p < 0.01$ , \*\*\*  $p < 0.001$ .

**Table S2.** Concentration of cytokines in BAL of GR<sup>+/+</sup> (n=6-7) and GR<sup>dim/dim</sup> (n=8-9) mice after hemorrhagic shock with subsequent resuscitation (4 h) at the end of experiment. \*p<0.05 vs. GR<sup>+/+</sup> calculated with Mann-Whitney t-test. Data is shown as mean (SEM).

| Cytokine in BAL [pg/ml]                                     | GR <sup>+/+</sup> | GR <sup>dim/dim</sup> |
|-------------------------------------------------------------|-------------------|-----------------------|
| Interleukine-1 alpha (IL-1 $\alpha$ )                       | 9.7 (0.47)        | 9.3 (0.70)            |
| Interleukine-2 (IL-2)                                       | 7.7 (0.64)        | 7.5 (0.77)            |
| Interleukine-3 (IL-3)                                       | 1.0 (0.11)        | 1.6 (0.18)            |
| Interleukine-4 (IL-4)                                       | 1.8 (0.22)        | 1.5 (0.079)           |
| Interleukine-5 (IL-5)                                       | 6.1 (0.95)        | 7.7 (0.93)            |
| Interleukine-6 (IL-6)                                       | 544 (105)         | 777 (98)              |
| Interleukine-9 (IL-9)                                       | 6.9 (1.0)         | 9.8 (0.52)            |
| Interleukine-10 (IL-10)                                     | 4.0 (0.53)        | 4.7 (0.68)            |
| Interleukine-12 p40 (IL-12 p40)                             | 16 (1.6)          | 13 (1.0)              |
| Interleukine-12 p70 (IL-12 p70)                             | 48 (5.0)          | 54 (3.8)              |
| Interleukine-13 (IL-13)                                     | 20 (0.73)         | <b>28 (3.0)*</b>      |
| Interleukine-17 (IL-17)                                     | 3.6 (0.16)        | 4.3 (0.29)            |
| Eotaxin                                                     | 93 (13)           | 144 (24)              |
| Granulocyte Colony-stimulating Factor (G-CSF)               | 107 (10)          | <b>204 (25)*</b>      |
| Granulocyte-macrophage Colony-stimulating Factor (GM-CSF)   | 23 (1.4)          | 30 (2.0)              |
| Interferon gamma (INF- $\gamma$ )                           | 3.1 (0.37)        | 3.4 (0.24)            |
| Keratinocyte Chemoattractant (KC)                           | 225 (31)          | <b>422 (49)*</b>      |
| Monocyte Chemoattractant Protein-1 alpha (MCP-1 $\alpha$ )  | 12 (1.3)          | 15 (2.5)              |
| Monocyte Chemoattractant Protein-1 beta (MCP-1 $\beta$ )    | 23 (5.2)          | 20 (3.3)              |
| Regulated And Normal T-cell Expressed and Secreted (RANTES) | 4.3 (0.44)        | 5.5 (0.74)            |
| Tumor Necrosis Factor alpha (TNF- $\alpha$ )                | 17 (1.4)          | 24 (2.2)              |
