# Supplementary material for: Impaired Glucocorticoid Receptor Signaling Aggravates Lung Injury after Hemorrhagic Shock
Source: Cells. 2021 Dec 30;11(1):112. doi: 10.3390/cells11010112 (PMC8750862; doi:10.3390/cells11010112)
Supplement: Supplementary file 1 [file cells-11-00112-s001.zip › cells-1505937-Table S1.xlsx]

## Sheet: DGE_heatmapCluster_genenames_up
Gene	BaseMean	Log2Foldchange	lfcSE	Stat	p-value	adjusted p-value
Msc	51.314020778985	1.95157505773131	0.533838864346877	3.65573806642752	0.000256443097100897	0.0238767825569534
Stat1	912.731762973059	1.05852574790703	0.297306976612544	3.56037977974031	0.000370318823204586	0.0302508555672501
Stk17b	1663.8032831073	0.857707521146211	0.218135960130015	3.93198590748172	8.42470055453975e-05	0.0105723887104
Coq10b	1539.10381613358	0.989011557918979	0.238764244804126	4.14220964588031	3.43975695959122e-05	0.00556726271272904
Igfbp2	5086.3330612274	1.10195737934931	0.296000325944628	3.72282488484643	0.00019700616459378	0.0196077744737648
Ackr3	1312.76119071428	1.14565036690583	0.250155535279034	4.57975221546838	4.65527109817215e-06	0.00104701279062526
Inhbb	1374.17367147674	1.83696828393508	0.285658822819423	6.43063730993637	1.27070032675726e-10	1.10029941293911e-07
Rgs2	3283.11045737209	1.52016271891088	0.261084759314821	5.82248739030317	5.79781754748453e-09	3.86179247258989e-06
Ifi204	204.211680231508	1.41516132547882	0.409251402620615	3.45792663486778	0.000544349598389454	0.0383213266053193
Mndal	732.33301858377	1.18284449963201	0.330844961535659	3.5752229507794	0.000349929565020166	0.0293251598296176
Stom	2371.25127215054	0.948799024983263	0.234942229648194	4.03843543327229	5.38088997128329e-05	0.00751502036473259
Tnfaip6	65.1963977747164	2.08010180078012	0.505398368140432	4.11576675333098	3.85894401378338e-05	0.00596689218131254
Stk39	611.727140271608	1.11493018790374	0.217594807086567	5.12388233355301	2.99307808892819e-07	9.25609399001042e-05
Rapgef4	969.723297728603	1.16361339176831	0.318996206036997	3.64773426688764	0.00026456305287035	0.0242418145481943
Slc43a1	323.398982795214	1.46573680926653	0.27326920357513	5.36371018062252	8.1529682146142e-08	3.0694152943628e-05
Trp53i11	640.365067245163	0.98168821516544	0.260442179570263	3.76931346829171	0.000163697193425643	0.0169754969805107
Hdc	1483.3005118368	0.787550021048547	0.212212363848996	3.71114107945635	0.000206327065661071	0.0204181264178196
Rtl8a	668.552566949426	1.40035722713177	0.325505115635492	4.30210512789581	1.69183001310861e-05	0.00311692682627818
Rtl8b	603.571791823867	1.14098669215098	0.311216755920715	3.66621227952665	0.000246169601320922	0.0234239843718446
P2ry10	251.039139439966	1.3419885830001	0.318842690552894	4.20893632741902	2.56575672307182e-05	0.00431395873108328
G530011O06Rik	41.2201224259288	2.88350069089182	0.719008561252284	4.01038436297571	6.06199840959551e-05	0.00826627468168307
Cyp7b1	198.474756843512	1.72882852948299	0.337061291952474	5.12912212336371	2.91096462027275e-07	9.22907724552113e-05
Gpr171	147.747477295416	1.6196966992155	0.311844984702956	5.19391613996397	2.05915923180815e-07	6.85779222624108e-05
Ccnl1	3530.71486494256	1.15878190200114	0.24337224676057	4.76135597803458	1.92296507203146e-06	0.000497043419663297
Fcrl1	61.8837898840082	1.58362470640397	0.394765897695036	4.01155397578782	6.03203817773332e-05	0.00826627468168307
Bcan	242.975165183298	1.03714919868886	0.295257812281532	3.51269011537593	0.000443594518666663	0.0332561466418583
Gm4610	242.158149117584	3.55650771829356	0.390621778807385	9.10473483877936	8.64774190916025e-20	3.74403985957093e-16
Prss12	376.065443886229	1.35955565514924	0.241828385217026	5.6219854171756	1.88775203695005e-08	1.05458354115809e-05
Bank1	79.1435593689935	1.60626870123784	0.409045488098905	3.92687059990123	8.60582497234499e-05	0.0107219911418036
Ifi44l	44.4178374114316	2.59306189689291	0.662049577321647	3.91671860494688	8.97624206447985e-05	0.0109472225403283
Pappa	273.199143567881	2.02165071405627	0.37674474675166	5.36610193370231	8.04564831228791e-08	3.0694152943628e-05
Pde4b	3571.0656381968	0.989303554616433	0.23489390533922	4.21170380384173	2.53451739585146e-05	0.00431395873108328
Gm12840	41.1487144114014	2.90897751391179	0.519041476460908	5.60451841680687	2.08834786070767e-08	1.13018775786673e-05
Alpl	197.315298131857	1.19247665211686	0.309665145313901	3.85085848427684	0.000117704501559925	0.0132364062208752
Isg15	211.126029611912	1.17074365847639	0.344836601972158	3.39506784309083	0.000686115965697419	0.0451793014979007
Fosl2	8373.81786135505	1.1654309834432	0.261259389030296	4.46081952410925	8.16468273653085e-06	0.00174562932878076
Ldb2	1120.69784450851	0.884163686865602	0.260079705564358	3.39958738782412	0.000674876102188139	0.0448500774702658
Pf4	185.198292660432	1.31449997864372	0.346322501571858	3.7955950672497	0.000147289739323572	0.0156700011286019
Cxcl15	16372.0925824725	1.20719276833065	0.231110817026848	5.22343689430342	1.75632337600906e-07	6.08320164514497e-05
Gm43085	1137.31270170918	1.06598903717653	0.243957644743336	4.36956602978373	1.24493693415962e-05	0.00242245144109846
Cxcl13	175.605339125152	1.47185043421168	0.387812796875977	3.79526009989397	0.000147488750661861	0.0156700011286019
Oas2	519.891704327434	1.53096451989428	0.381689125070237	4.01102473017159	6.04557766636828e-05	0.00826627468168307
Scarb1	4298.83120091247	1.14863215098242	0.310081573554813	3.70429025438165	0.000211983423618598	0.0207408414137112
Prkar1b	663.99551705814	0.81557681836979	0.209328017567614	3.89616654209394	9.77272013430361e-05	0.011753053283741
Hilpda	2275.4537097847	1.30491207708093	0.328466284468572	3.97274283170998	7.10497445232667e-05	0.00939266775308346
Fam71f2	179.921382060704	1.50630380631976	0.419256297847809	3.59279947385919	0.000327144339930479	0.0284568650259141
Mest	244.030040311237	1.04994399641681	0.290750901083779	3.61114614779569	0.000304846805861645	0.0272130772366596
Gimap3	694.034219981622	1.30003879495936	0.336137743203243	3.86757756677536	0.000109921869559923	0.0127760197116695
Igkc	2385.13421720253	1.97624442631388	0.361012446638562	5.47417255198531	4.39560604540624e-08	1.95187449985501e-05
Mat2a	10112.2459269533	0.799580270023604	0.227783480775699	3.51026451655183	0.000447661124343187	0.0334163592731694
Cd207	71.7723210840095	2.13297371489547	0.383757061473227	5.5581354169929	2.72671805174419e-08	1.32458823838767e-05
Mxd1	2762.30970302021	1.03414112138139	0.214512360375495	4.82089292929865	1.42917054233397e-06	0.000392863102414915
Lrrc4b	54.0826167475231	1.76557968807678	0.466881031045763	3.7816479374244	0.000155793593144426	0.0164514234516778
Abhd17c	2940.8688422259	0.686892775017057	0.192149569287328	3.5747817575897	0.000350520157335192	0.0293251598296176
Cavin3	663.946740258942	0.854973020214759	0.215406579479649	3.96911283898613	7.21407161956279e-05	0.00946464335663548
Il21r	189.276391899768	1.20253298302334	0.29418096943008	4.08773206966112	4.35610832450281e-05	0.00655992034467301
Chst15	1923.29383011428	1.0353718144951	0.252070342601234	4.10747176288415	4.00013662877875e-05	0.00613047487939738
Ifitm6	230.317604738024	1.30893081670024	0.386499171508921	3.38663291719379	0.000707559921555081	0.0460658748928229
Irf7	596.257021844588	1.25294957536307	0.326704155977368	3.83511979397613	0.000125503109875249	0.0138437124638189
H60c	111.730341714329	2.37679745724132	0.35191152860808	6.75396303906921	1.43860412995792e-11	1.46551448956537e-08
Popdc3	315.706803828031	0.805287431745212	0.239539309583659	3.36181745344794	0.000774312943909842	0.0496650057875209
Lilr4b	1501.622748922	1.01591467215842	0.299532335894077	3.39166944739374	0.000694681933080469	0.0455700822616953
Srgn	2522.27671343674	0.853552789542573	0.230579404145791	3.70177376728274	0.000214097479169376	0.0208300008104228
Egr2	288.026012958436	1.16116267579942	0.343636659836472	3.37904191116275	0.000727389181960215	0.0471794975774794
Gm22918	64.2610220146057	5.01935057714621	0.593653399195295	8.45501867579636	2.79042685296464e-17	9.66492244792833e-14
Fgfr1	3548.86906833657	1.11372240193009	0.286590871971726	3.88610563298041	0.000101865195096231	0.0121662168874243
Tll1	152.371196811148	1.2735492003028	0.329615788191734	3.86373846741222	0.000111664776430807	0.0128155902376428
Cyp4f18	237.982347862533	1.35936089210198	0.31093525948535	4.37184542644647	1.23200739518294e-05	0.00242245144109846
Wdr83os	713.830558723707	0.844070851522129	0.219417919784895	3.84686379466913	0.000119639435055282	0.0132981291777888
Nod2	128.942043715666	1.2477395461182	0.318106487793616	3.92239578253344	8.7672819678327e-05	0.0107682119942501
Itih3	66.1603110584212	1.60458734276234	0.450505718140375	3.56174689499137	0.000368395447823914	0.0302363619213959
Pnp	1001.25387838092	0.768042293981477	0.195673215954216	3.92512736214846	8.66838622375731e-05	0.0107227937587878
Trac	132.388784118364	1.3217363849857	0.365566605222408	3.61558295014823	0.000299672495538362	0.0268897838224526
Tnfrsf10b	1442.17928808135	1.44550178538733	0.196760906034731	7.3464887640443	2.0348132044309e-13	3.20353591584857e-10
Hr	461.058781469889	1.58243917586655	0.299815615940746	5.27804120843158	1.30572105986902e-07	4.71093277391912e-05
Clmp	190.918238686817	1.14333188740741	0.338697758561298	3.37567007311767	0.000736361644032709	0.0475832498185017
Il10ra	575.622706669732	0.958699981170688	0.274621412554243	3.49098772835613	0.000481238356840449	0.0351649192563835
Fxyd6	1009.15206636223	1.65381883928361	0.242007235305664	6.8337578304003	8.27186196395225e-12	8.95325659323281e-09
Cryab	4616.20628919437	0.689003246877493	0.193392649469171	3.5627168290454	0.00036703652917847	0.0302363619213959
Camp	17.8025171088996	3.86612346964775	0.998724885550293	3.87105951356918	0.000108363329440049	0.0127662322397467
Ngp	73.5453942644725	2.72937752955364	0.503229072074209	5.42372784287619	5.8368731529058e-08	2.39819937463489e-05
Osm	150.836345341153	1.96148484412452	0.396175579863165	4.95104934231938	7.3814383666652e-07	0.000213052916056513
Ramp3	125.502691041046	2.04926361348805	0.415259523275024	4.93489853604352	8.01924379065886e-07	0.000227667645846935
N4bp3	767.545779675543	0.927703372168107	0.214721372934934	4.32049851157212	1.55677106408593e-05	0.00289894207396131
Tmem88	263.895936131549	1.2024272298831	0.300986829939238	3.99494964655376	6.47080040573923e-05	0.0087547907364525
Dnah2os	44.5846687569712	2.05748245571506	0.595913735835583	3.45265150304026	0.00055510565503349	0.0389203228091902
Doc2b	1077.32975093645	1.43681005034374	0.36017495633797	3.98920031795746	6.62964183976923e-05	0.00883170287547103
Ccr7	261.398822979394	1.02456700861353	0.293190288979804	3.49454619448225	0.000474868424165478	0.0349947717859479
Mpp3	447.362016961631	1.99147399306474	0.254615565123119	7.82149352142615	5.22002584649496e-15	1.13000509512e-11
Sugct	163.400407742073	2.75394947879814	0.424240590836763	6.49148039645691	8.49969725473563e-11	7.74725037144798e-08
Gm11274	26.8820585031304	2.28580019265466	0.580369294923	3.9385270941288	8.19833376005174e-05	0.0103634119749326
Isca1	1772.53050047246	0.707588632303722	0.201325920214847	3.51464248393158	0.000440346375255298	0.0332561466418583
Ctla2a	3777.39630165468	0.950312514544543	0.201211563757252	4.72295178666287	2.32445969926601e-06	0.000559097125998455
Fbp2	137.793161175807	1.1406600300854	0.329567615276985	3.4610804496878	0.000538012006510137	0.038185622658781
Rps3a3	3272.56760681308	0.836076583419936	0.205150318773841	4.07543399599408	4.59286085059326e-05	0.00674888008575618
Slc26a4	67.6148945280365	1.36267942344205	0.388640073048338	3.50627616126595	0.000454423471028175	0.0337755608208838
Rhoj	2474.83183017368	0.896641221010298	0.233102265976015	3.84655729216531	0.000119789129907325	0.0132981291777888
AU015791	16.7529505798558	3.04796729334309	0.822174149051309	3.70720399912851	0.000209560132324134	0.0206202407476667
Bdkrb2	655.07798888131	0.854440819150661	0.252036663708985	3.39014493596552	0.000698556807039113	0.0456513463558617
Gpr132	369.024494582828	1.29503752608133	0.376590777616584	3.43884556673833	0.000584200396742512	0.0405501500825257
Ighd	308.596404686934	1.21454877959796	0.356338532308871	3.40841270161937	0.000653419888374861	0.0445508882947868
C6	1043.32542340315	0.997077629726377	0.255137400221708	3.90800262470317	9.30622955860947e-05	0.0112702995451747
Npr3	3548.68137097616	1.46514452525654	0.315112806111194	4.64958737582863	3.32599758759524e-06	0.000767995016292992
Il2rb	286.253669324781	1.10422320279545	0.29045229228275	3.8017369190549	0.000143685251579629	0.01555213241785
Gm23689	71.0420704311986	2.20820128825546	0.472806043727558	4.67041679680364	3.00589216258415e-06	0.000713096444816881
Litaf	2715.5295760426	0.850617724192039	0.240543922239933	3.53622621711299	0.000405886968762529	0.0315208543723295
Cldn5	11764.8410631481	0.931425481547826	0.259953539458037	3.58304596848231	0.000339610814516899	0.0289723156936141
Masp1	352.166912898403	1.68240413748241	0.307763284397208	5.46655245370678	4.58872680335364e-08	1.98668926951196e-05
Cldn1	315.714260891871	1.36793784206488	0.302040593597035	4.52898673576937	5.92672190497732e-06	0.00129922746772655
Apod	292.863642624753	1.57315416946083	0.420131503447036	3.74443277058167	0.000180801779970212	0.0182042164274659
Retnlg	700.876074139687	1.09633188312387	0.299801584925248	3.65685819638754	0.000255325533148028	0.0238767825569534
Tmem45a	302.419242946003	1.1772894372421	0.311458165150765	3.77992799345048	0.000156873719966596	0.0164650853477667
Jam2	1668.56084099405	1.09969108424856	0.256567119803807	4.28617308831109	1.81777376062416e-05	0.00327918812359263
Gm6278	174.502783012415	1.07342817319337	0.298368944961052	3.59765381525711	0.000321100607574136	0.0282275143247152
Adamts1	7827.8396731452	2.31282199922461	0.317228975149178	7.29070223846039	3.08343567394645e-13	4.13496057916089e-10
Slc22a3	107.250549790248	2.05471389332268	0.378157561613622	5.43348620229908	5.52635587657274e-08	2.33427880659724e-05
Dll1	898.04722058602	1.26295110303579	0.264008344329075	4.78375449172008	1.72050812624395e-06	0.000458396303542964
Pim1	2218.10728447986	0.745403398862779	0.209824672717158	3.55250595275598	0.000381580384874136	0.0303466010550528
Trem1	134.49239789661	1.07870233807739	0.30331613694764	3.55636316924213	0.000376024184881446	0.030281855995976
Satb1	631.534401505845	1.01347672201689	0.275278680950225	3.68163897951888	0.000231739406742179	0.0222959058108947
Rasgrp3	1096.01621362089	1.16532190348424	0.292063509381667	3.98996062860218	6.6084263808752e-05	0.00883170287547103
Gm47283	940.492896491315	1.0713474686762	0.313884958622167	3.41318511526963	0.00064208311635035	0.043950969995871
Crem	725.065352522599	1.44915878268298	0.263947568409954	5.49032821712606	4.01187516328219e-08	1.82835931783476e-05
Spink5	202.333802424932	0.99843327793106	0.271305454383864	3.68010764913852	0.000233135514039047	0.0223063029399349
2700046A07Rik	29.9309499780642	2.174880279982	0.571301311518083	3.80688830243156	0.000140726264821133	0.0153276569444804
Grp	145.96290792	1.46303758882935	0.329914369439504	4.43459795738793	9.22442702545062e-06	0.00192468225574402
Tmem252	1448.42772008293	2.05288640672438	0.249989384930681	8.21189430620672	2.17725891618383e-16	6.28429498507859e-13
Ch25h	665.723186182297	2.58599269051009	0.362787120536229	7.12812705888726	1.01743837708205e-12	1.2585712724505e-09
Irs1	180.925137421962	-1.21381986957504	0.356823132885231	-3.40174096830615	0.00066958069784478	0.0448500774702658
Col4a4	3727.87083340855	-0.819593449920187	0.224446213515142	-3.65162520268978	0.000260586002985395	0.0241232725051007
Ccl20	208.362919059714	-1.4616113768519	0.340584837263063	-4.29147518309212	1.77490041849323e-05	0.00323555004710166
Sned1	960.775823405991	-1.26392495430572	0.295052664210221	-4.28372662788494	1.83788709615863e-05	0.00328129162178094
Gm38394	56.1797282667803	-2.44046700953378	0.682473676448425	-3.57591375865792	0.000349006701477786	0.0293251598296176
Prrg4	63.9124538475319	-1.6609973775561	0.488584102938223	-3.3996140430425	0.000674810322811953	0.0448500774702658
Lrat	274.881770545411	-1.19365413205651	0.341748167048849	-3.49278868812745	0.00047800460333447	0.0350766259345184
Thbs3	1081.79969923373	-0.928457223002029	0.218847327737161	-4.24248827985289	2.2105508903787e-05	0.00382823203195783
Lpar1	572.190403522055	-0.959322754594368	0.216775890392694	-4.42541259019411	9.62581280632017e-06	0.00198452174023634
Cyp4a32	56.6397416680084	-2.05424111457417	0.44554327030019	-4.61064334602137	4.01424725945137e-06	0.000914720184726038
Tent5b	533.8625008711	-0.908432154150538	0.242384462227129	-3.74789764081199	0.000178322994396352	0.0181658683350354
Hopxos	70.4091066310845	-1.8559487161861	0.470818389325653	-3.94196309716015	8.08174131976657e-05	0.0102911467776263
Cit	323.802406519859	-0.880260025688003	0.249850815156523	-3.52314250060201	0.000426461999922038	0.0325213275086635
Elfn1	309.534645658923	-1.10656957620727	0.286945310355407	-3.85637797961112	0.000115079500762455	0.0130257960405503
Fkbp14	647.783103657264	-0.89435565506933	0.217161965038215	-4.11838074366267	3.81543933699394e-05	0.00595277283225775
Cacna2d4	135.032336822563	-1.78466237054996	0.31105668284662	-5.73741851233578	9.61305055228447e-09	5.74064860222284e-06
Cecr2	505.021025892394	-0.943544157251319	0.23153613662347	-4.07514857512602	4.59849780643971e-05	0.00674888008575618
Clec2d	2240.02394039749	-1.18144025277457	0.290475772454985	-4.0672591823735	4.75693260773965e-05	0.00686504657506961
Gm45133	92.7977392285572	-1.53115569750725	0.403386637806911	-3.79575214943081	0.000147196500519798	0.0156700011286019
Gp2	14.7471342547854	-3.27028268593729	0.928506367937881	-3.5220896688089	0.000428159295067287	0.0325213275086635
Srcap	106.101843543454	-1.57089913040821	0.437379991610364	-3.5916117804667	0.000328639161865274	0.0284568650259141
Muc5b	851.016766613724	-1.08279580408503	0.310803505292807	-3.48385969155958	0.000494238512651094	0.0358126467033123
5430430B14Rik	103.147509148009	-1.17386269861365	0.335348121045842	-3.50043022442693	0.000464507824332073	0.0343775491529181
Nwd1	116.925597127324	-1.70150310942788	0.440396729989818	-3.86356889949482	0.000111742356270012	0.0128155902376428
Gpr137c	284.711843718177	-2.23352937595861	0.291373245082337	-7.66552665234398	1.78098876368215e-14	3.42701815660527e-11
Lmo7	13336.5266887476	-0.76261592668785	0.214383809227852	-3.55724590133261	0.000374763315433825	0.030281855995976
Acvr2b	129.121736716578	-1.20356478347306	0.329211773069772	-3.65589836672694	0.000256282883256446	0.0238767825569534
Scgb3a1	1256.97905575771	-1.08368689307749	0.304221457548582	-3.56216455541909	0.000367809712251802	0.0302363619213959
Ankfn1	62.2423352248199	-2.08914741874226	0.539219211309398	-3.87439352108605	0.000106890566615263	0.0126789783057748
St6galnac1	56.0617730542254	-1.45078209218263	0.40372516672246	-3.59348936297539	0.000326278974708066	0.0284568650259141
Zfp169	68.5581376508876	-1.64606087783559	0.474920724059261	-3.46596978073795	0.000528322657308925	0.0376522295443455
Rab3c	72.7880619363351	-2.35502638100337	0.398339721742574	-5.91210530223068	3.37762482516203e-09	2.33974826888624e-06
Srp54a	56.4084880465355	-2.13372822354343	0.434102651299998	-4.91526190211832	8.86638485859821e-07	0.000247658149969684
Gm47720	46.855261655369	-2.4727733343946	0.719184577319592	-3.438301393518	0.000585375766291224	0.0405501500825257
Unc79	81.0653345893235	-1.64675170000797	0.476002619099621	-3.45954335949427	0.00054109215224532	0.0382474852758549
Serpina3k	13.7444793249685	-6.20427263202913	1.41831277703419	-4.37440368054977	1.21764871127696e-05	0.00242245144109846
Erich5	8.08452901462788	-6.43133874799782	1.55678780681595	-4.13115950667138	3.60938015323761e-05	0.00578770791608972
4930562C15Rik	497.356260933324	-1.43832198327187	0.344862100527304	-4.17071629811637	3.03643692154746e-05	0.00500809662927228
Muc4	542.424593458562	-1.219614791087	0.297969594152844	-4.09308471407789	4.25672113686793e-05	0.00646648216212973
Rcan2	657.691997568148	-0.772712338669709	0.217123599942886	-3.55885928048803	0.000372469017455642	0.030281855995976
Gnmt	185.064487357282	-1.10834473251701	0.307809775661922	-3.60074572074132	0.000317305788384045	0.0281800084268456
Scd2	23084.1497366316	-0.695073896055818	0.195897588588012	-3.54814932162137	0.000387948216588071	0.0305185133425479
Qsox1	6184.83555830849	-0.784710258897361	0.23080153412887	-3.39993519479473	0.000674018257382141	0.0448500774702658
Lamc3	419.301641064544	-2.02030023944822	0.39129236756915	-5.1631475768338	2.4283154146613e-07	7.93463516058574e-05
D930015M05Rik	23.5913603417905	-2.21799809057989	0.618133352379463	-3.58821940612306	0.000332944056728538	0.0286861948976359
Amot	174.89479820104	-1.09385862915685	0.302480667857921	-3.61629269368927	0.000298852446034688	0.0268897838224526
Nes	1632.48509716349	-0.711598957958674	0.206326240707883	-3.44890187267143	0.000562871208324015	0.039305659619981
Clca3a1	336.961544377052	-2.65635746627375	0.325372336698809	-8.16405442830468	3.23962815899107e-16	8.0148400653439e-13
Cntfr	152.125063154422	-1.27524495085968	0.359000087502682	-3.55221348198183	0.000382004794433624	0.0303466010550528
Tmod1	862.093450709125	-0.884170458410497	0.236076279977084	-3.74527444475287	0.000180196680408917	0.0182042164274659
Jun	7718.39645994695	-0.901559729724286	0.246043947242679	-3.66422234656745	0.000248091200896024	0.0234778328804226
Tinagl1	3115.03470774694	-0.879804352974209	0.249335259496604	-3.5285998247921	0.000417764349011514	0.0321548577608062
Map3k6	1611.25226020436	-1.07441729738648	0.286190288795255	-3.75420599318497	0.000173891817292787	0.0179253481659314
Rap1gap	1949.7383711286	-0.883106767627212	0.253594298820747	-3.48236049364594	0.000497014113514479	0.035863710074349
Angptl7	255.275410582836	-2.36257837769104	0.411583686037889	-5.74021385646843	9.45570655001994e-09	5.74064860222284e-06
Adgrl3	940.943550857857	-1.54662378244053	0.244606145687325	-6.32291465161121	2.5667508762988e-10	2.02049962162467e-07
Tecrl	75.4861276864465	-1.65139630788365	0.418283849822007	-3.94802789681306	7.87976242633848e-05	0.0101082759777281
Prkg2	401.233287102905	-1.07076877433613	0.254612343331722	-4.2054865067601	2.60521132476243e-05	0.00433817785790729
Pdk4	885.953721840016	-1.51535630450663	0.207873275380883	-7.28980818592515	3.10396625066933e-13	4.13496057916089e-10
Mcf2l	2859.35980149378	-1.18615648109245	0.293187743530291	-4.0457232857345	5.21618197312963e-05	0.00743199007945007
Zfp503	2310.49713090432	-1.17065898708016	0.221473722769996	-5.28576922101006	1.25177624333273e-07	4.61239595362474e-05
Slc7a8	166.026440573248	-1.21579332586457	0.341976133947894	-3.55519934045988	0.000377692625888141	0.030281855995976
Zbtb16	1469.86111192445	-1.68246544666488	0.355258801534892	-4.7358867377692	2.18099372175916e-06	0.000533311818801543
Sec14l4	1548.57429617042	-0.972499612644921	0.240616416339191	-4.04170100877079	5.30648659541933e-05	0.00747136055768065
Hoxb3	92.173120434237	-1.49101468169781	0.386129947730538	-3.86143237648669	0.000112724213595954	0.0128431442832548
Sdk2	131.740635728146	-1.93071572592701	0.44523136205013	-4.33643244949493	1.44813903287481e-05	0.00272596432297021
BC018473	1173.66227903703	-1.13228797608425	0.210547259339929	-5.37783288955649	7.53877386532069e-08	2.96719285908236e-05
Fst	114.514486173479	-2.04447055606598	0.393477227448617	-5.19590566733107	2.03725552151189e-07	6.85779222624108e-05
Klhl29	252.4018627285	-1.30069011444532	0.290563458618806	-4.4764407769241	7.58977090186489e-06	0.0016429956559812
Slc38a4	342.163538930523	-1.66374628228153	0.315960418280363	-5.26567945230793	1.39671807783352e-07	4.93640074937161e-05
Tmem204	4167.43214725389	-0.763548318575123	0.210856098891106	-3.62118204116756	0.000293260067127746	0.0265899363482634
Fkbp5	1535.31686128563	-1.2535623462366	0.264722707872856	-4.73537897942128	2.1864614352067e-06	0.000533311818801543
Mocs1	840.721625506036	-0.743531699648731	0.209631616753578	-3.54684904483064	0.000389867912266579	0.0305185133425479
Ston1	790.056168207055	-1.66363961945616	0.329207703695036	-5.05346503372621	4.33865776959795e-07	0.000131819079392802
Arhgef37	46.2496830547528	-1.71090489618746	0.501165381207512	-3.41385291231648	0.000640511448906641	0.043950969995871
Ccbe1	389.971596232014	-1.68368207369339	0.303276423129641	-5.55164182008858	2.82998988453307e-08	1.32458823838767e-05
Klf9	3545.66873510478	-1.13354564179278	0.255497090533257	-4.43662837579447	9.13788482038734e-06	0.00192468225574402
Sorbs1	539.91712855513	-1.45070367810994	0.306287289188006	-4.73641489320656	2.17532029937221e-06	0.000533311818801543
Gsta3	4728.73781246104	-0.724471293626134	0.211721218838789	-3.4218171310348	0.000622041354831261	0.0429183752309473
Per2	1891.58814468271	-1.16903683965411	0.2508030832931	-4.66117411438647	3.14410594915065e-06	0.000735805767937716
Fmo2	30223.039495815	-0.854124222443345	0.216168292585933	-3.95120029966378	7.77602076639814e-05	0.010101378667135
Kif26b	228.508580934559	-1.07715219214587	0.305524254168165	-3.5255865203847	0.000422546126882691	0.0323789992272321
Gata3	269.401470704639	-1.17300774252014	0.278661682612762	-4.2094332149361	2.56012100560287e-05	0.00431395873108328
Ptgs1	1544.02464674138	-1.29154871525452	0.201613354110982	-6.40606730119458	1.49321071261966e-10	1.23140110100701e-07
Gpr155	1034.89327304624	-1.06983370422836	0.25787410742311	-4.1486666300817	3.34417387003005e-05	0.00546362293218684
Fibin	2421.7030826702	-0.818144418601468	0.232903631281694	-3.51280232986979	0.000443407224009497	0.0332561466418583
Kcnip3	92.1415432681373	-1.34584495777763	0.387132058704803	-3.47644925682547	0.000508100368361009	0.0363606701622973
Wfdc8	112.40535443612	-2.84356234137778	0.460692835402689	-6.17236067691879	6.72778061060676e-10	4.85465435893699e-07
Gria3	554.555349686036	-1.44223588823046	0.266087437848257	-5.42015774924682	5.95464679000465e-08	2.39819937463489e-05
Armcx4	1521.42048259841	-1.45418770953027	0.340712531481275	-4.26807814555007	1.97164263201278e-05	0.00345265981380742
Tsc22d3	3677.01906086275	-0.993085555944954	0.245518364814515	-4.04485243576469	5.23560913323079e-05	0.00743199007945007
Tnik	694.189362422506	-1.06428192790597	0.26944042146706	-3.94997128534435	7.81605694304245e-05	0.010101378667135
Smad9	385.076253243851	-1.2031973311324	0.27510213613901	-4.3736386347957	1.2219258504686e-05	0.00242245144109846
Bche	239.938878427269	-0.991425438745189	0.279594667730494	-3.54593829271752	0.000391217805869363	0.0305185133425479
Zfp697	557.940185238804	-0.913624391912536	0.256298856449789	-3.56468384045062	0.000364295040428473	0.0302363619213959
Chil3	3853.3271954537	-0.879025296604837	0.23440653777093	-3.75000332739802	0.000176832223963896	0.0181205944059571
Fam102b	1118.62705230148	-0.877197358008625	0.257613282023079	-3.40509367808932	0.000661413604657373	0.044743596896314
Gm12473	77.0704216618944	-2.03120369434751	0.396113898800976	-5.12782737615595	2.93105005487737e-07	9.22907724552113e-05
Kank4	489.859262203146	-1.01517434104385	0.301766617182007	-3.36410418927007	0.000767925470292785	0.0494384137343139
Nipal3	1744.40877774883	-0.782309897991919	0.212331975414679	-3.68437159059104	0.000229267570086828	0.0221813171997971
Tcf23	46.2556736584549	-2.18734757610995	0.456970705890671	-4.78662537426035	1.69609002123149e-06	0.000458396303542964
Hs3st1	588.97057269569	-0.999919699431536	0.234291736091365	-4.26784024103012	1.97374593813913e-05	0.00345265981380742
Spp1	1565.85057656469	-4.58057040445263	0.328755856606818	-13.9330457918833	3.98971708742607e-44	6.90939205200448e-40
Tbx3	3412.26215606983	-0.873322066305211	0.250460913862672	-3.48685969733407	0.000488727677286972	0.035562125694352
Slc13a4	210.678785196969	-2.08581046725339	0.375622433002663	-5.55294435047387	2.80897520812364e-08	1.32458823838767e-05
Reg3g	58.8899508156958	-3.57128773974757	0.573345943368215	-6.22885324480967	4.69861659636678e-10	3.53785400938608e-07
Klf15	1563.90157270103	-0.766524551708427	0.211634926151832	-3.6219189603823	0.000292425737586102	0.0265899363482634
Lrtm2	835.4773162067	-1.76453224137764	0.263840986567955	-6.68786250510461	2.26453741960063e-11	2.17873661292465e-08
Nox4	1845.93096857141	-1.15616359415325	0.283861576436322	-4.07298377141443	4.64146596139709e-05	0.00675469811088024
Scube2	591.762143142854	-2.20817542085349	0.296889213870413	-7.4377084706665	1.02446834026765e-13	1.77417427167552e-10
Sult1a1	1467.1408496841	-2.23017553351843	0.226680065308423	-9.83842814093085	7.69029151456544e-23	4.43934894830814e-19
Gprc6a	63.1677170230652	-1.71860709414546	0.450688292583855	-3.8132942932519	0.000137126664536262	0.0150301239015126
Adarb1	1557.25771405992	-1.09726283568848	0.252047741578359	-4.35339284858201	1.34046627802528e-05	0.00257813999783464
Nuak1	846.193937769392	-1.2305518526857	0.247758047848302	-4.96674825852338	6.80848773340525e-07	0.000199846424690021
B530045E10Rik	58.544927157473	-2.47814888808184	0.439957709545576	-5.6326979487221	1.77412027706179e-08	1.0241404986052e-05
Grtp1	358.566235753747	-0.955796612504216	0.26659653664196	-3.58518015478893	0.000336845599465626	0.0288786737205233
Adgre5	7234.08319301923	-1.09854903576644	0.284034907467172	-3.86765502016122	0.000109886972160346	0.0127760197116695
Fam107a	338.788568333794	-1.91155102644013	0.341875250588238	-5.59137001918411	2.25284909462422e-08	1.18226789759704e-05
Bmp4	1556.25190792836	-0.735386602345505	0.216440559159059	-3.39763769416747	0.00067970372539363	0.0449278973907133
Scara5	105.052476200778	-1.5889343138581	0.385354218819521	-4.12330846857102	3.73469017774019e-05	0.0058797604089186
Gm10032	10.6185396658408	-6.79939800697699	1.42701268382449	-4.76477755527313	1.89062106020669e-06	0.00049608750788878
Glb1l2	882.452766923356	-1.45615019201637	0.261467061326322	-5.56915347053613	2.55979944463539e-08	1.30384137594693e-05
Cyp1a1	227.346691527271	-3.59279719872362	0.347809390323842	-10.3297878052642	5.16747694944268e-25	4.47451829052242e-21
Myzap	3315.10228849891	-0.959610060572618	0.254117802078788	-3.77624099029117	0.000159212955561504	0.0166099395446634
Pcolce2	3657.69971572283	-0.793010502327501	0.224463218037303	-3.53291959930697	0.00041099744295411	0.0317752398083896
Myrip	837.012778171616	-1.65342862702516	0.285038808168378	-5.80071407697034	6.60331118835393e-09	4.23541270962642e-06
Pik3ip1	790.369352409754	-0.922732952908692	0.252778845985182	-3.6503566954443	0.000261876384741825	0.0241232725051007
Ccdc85a	658.745114467831	-1.61909843481846	0.323076172423951	-5.01150679937431	5.40054749057116e-07	0.000161252899037433
Adap2	262.659359041352	-1.24961915024122	0.366867500341932	-3.40618656347737	0.0006587714533318	0.0447396236423534
Prkca	1029.26678771858	-0.803588729765453	0.194639970829008	-4.12859047575284	3.64993817396295e-05	0.00579904855932939
St6galnac2	1266.24155160718	-0.780645745523562	0.224328731219837	-3.47991869467022	0.000501565970617763	0.0360419895400764
Rbfox3	112.852149113588	-2.59664631585293	0.366013893427976	-7.09439276070514	1.29920673091225e-12	1.49997747772923e-09
Bmp6	3846.40795260134	-1.00487577732694	0.220840473419002	-4.55023375819515	5.35863514069521e-06	0.00118975440213538
Gas1	497.215377264388	-1.20374858158104	0.253349559115259	-4.75133481891479	2.02078200245416e-06	0.000514645628213252
Clec14a	8106.7910898631	-0.983105286734906	0.241002205234656	-4.07923772223449	4.51836146685157e-05	0.00674560205887375
Jag2	828.575451145217	-0.84348900707213	0.248146456272604	-3.39915798009828	0.000675936610448053	0.0448500774702658
Angpt1	1653.05148446178	-0.782419936789791	0.218718649780544	-3.57728953417941	0.00034717555405842	0.0293251598296176
Cntn1	194.100371311608	-1.47418972442346	0.338810522347899	-4.35107420574654	1.35472190670373e-05	0.00257813999783464
Gm16031	44.6941989525168	-1.86113977672519	0.498444330292506	-3.73389697427796	0.000188539643540148	0.0188735811955392
Krt80	3389.90271342617	-0.802392398043387	0.22609367436966	-3.54893784746709	0.000386788363503143	0.0305185133425479
Prodh	822.804076585065	-1.1671382280821	0.264408697523073	-4.41414461406003	1.01410155713403e-05	0.00206614244311142
Itpr3	2217.28257163542	-0.69671122104734	0.193601663296358	-3.59868406698986	0.000319831444402439	0.0282275143247152
